# Supplementary material for: Crystal structure of lead(ii) acetylacetonate and the structure of the acetylacetone solvated lead(ii) ion in solution studied by large-angle X-ray scattering
Source: Royal Society of Chemistry journal article supplement (doi:10.1039/b606543k), 2006-01-01

## **Crystal Structure of Lead(II) Acetylacetonate and the Structure of the Acetylacetonate Solvated Lead(II) Ion in Solution Studied by Large Angle X-Ray Scattering**

Krzysztof Lyczko,<sup>\*a</sup> Jerzy Narbutt,<sup>a</sup> Beata Paluchowska,<sup>b</sup> Jan K. Maurin<sup>b,c</sup> and Ingmar Persson<sup>\*d</sup>

<sup>a</sup> Department of Radiochemistry, Institute of Nuclear Chemistry and Technology, Dorodna 16, PL-03-195 Warsaw, Poland. E-mail: kml@ichtj.waw.pl

<sup>b</sup> Institute of Atomic Energy, PL-05-400 Swierk, Poland

<sup>c</sup> National Institute of Public Health, Chelmska 30/34, PL-00-725 Warsaw, Poland

<sup>d</sup> Department of Chemistry, Swedish University of Agricultural Sciences, P.O. Box 7015, SE-750 07 Uppsala, Sweden. E-mail: Ingmar.Persson@kemi.slu.se

Supplementary Information

### Legends to Figures

**Fig. S1** ATR-IR spectra of Hacac solvent (dashed line) and 1 M  $\text{Pb}(\text{CF}_3\text{SO}_3)_2$  solution in Hacac (solid line) (ZnSe crystal).

**Fig. S2** IR spectrum of solid  $\text{Pb}(\text{acac})_2$  (a – KBr pellet, b – CsI pellet).

**Fig. S3**  $^1\text{H}$  NMR spectrum of 1M  $\text{Pb}(\text{CF}_3\text{SO}_3)_2$  solution in acetylacetone (with acetone- $d_6$  as ext. ref.).

**Fig. S4**  $^1\text{H}$  NMR spectrum of acetylacetone solvent (with acetone- $d_6$  as ext. ref.).

**Fig. S1**

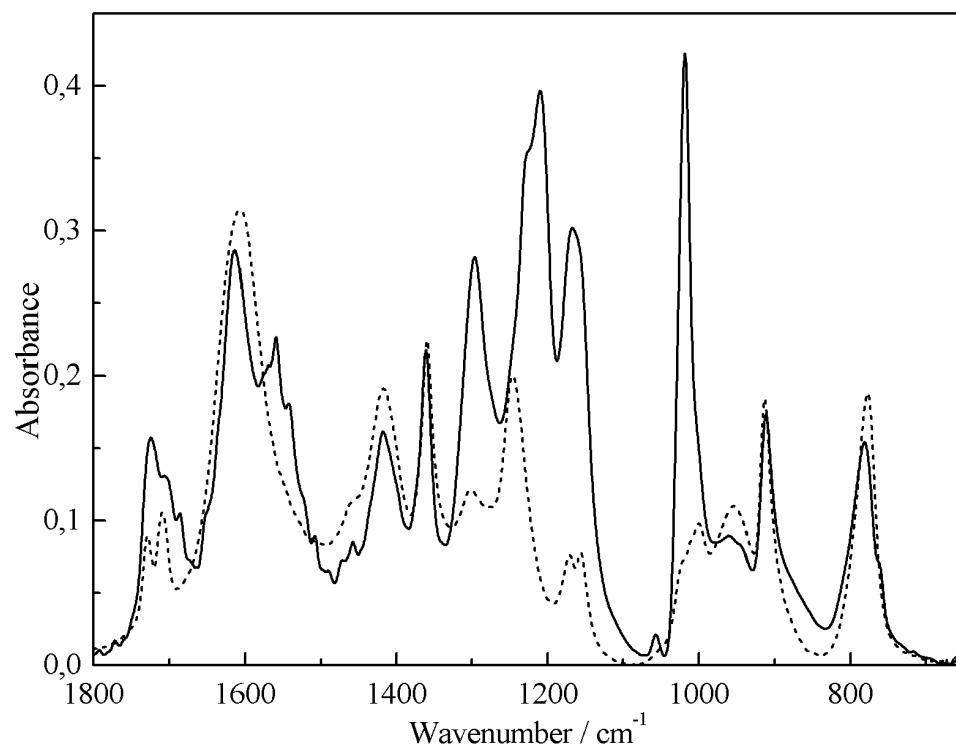

**Fig. S2**

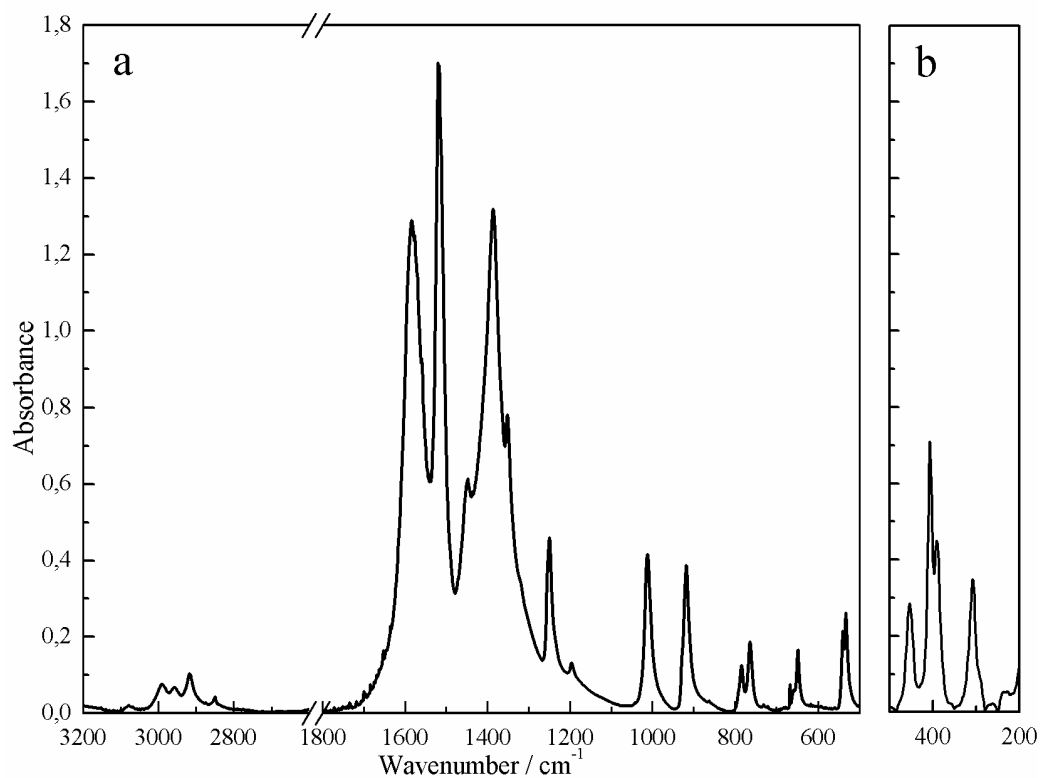

Fig. S3

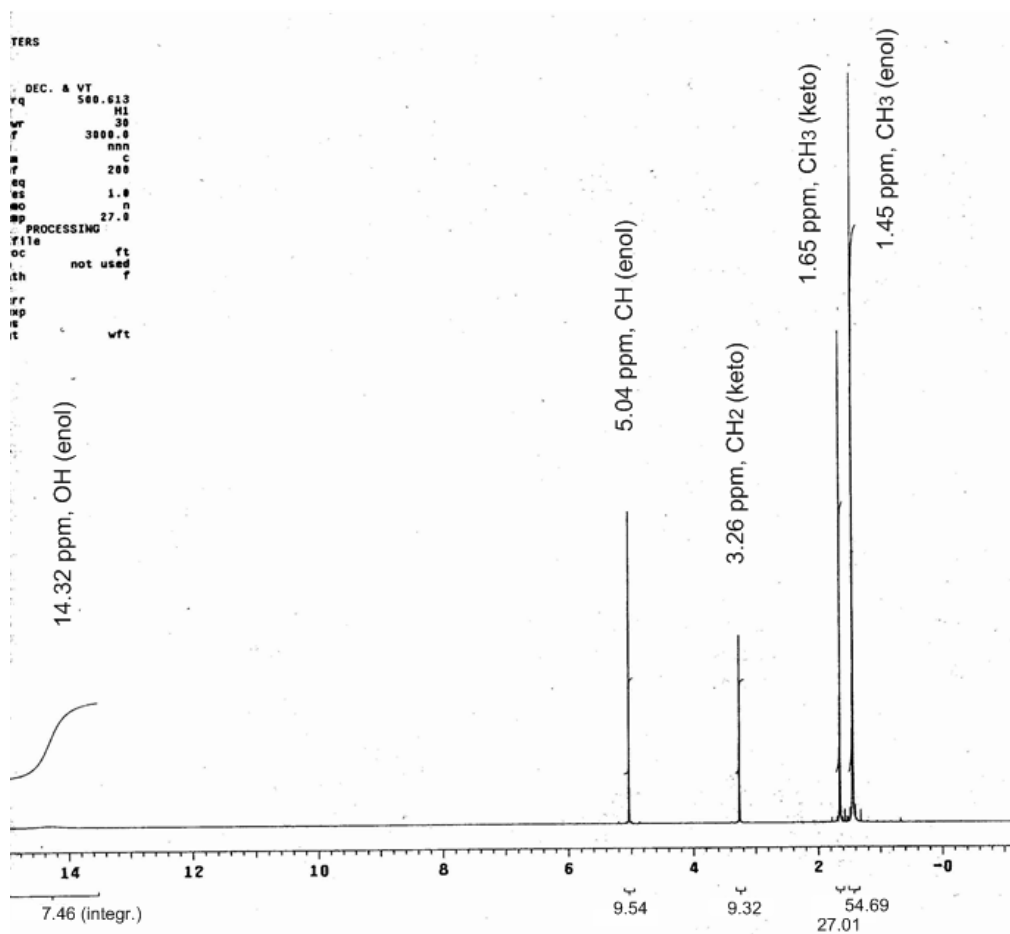

Fig. S4

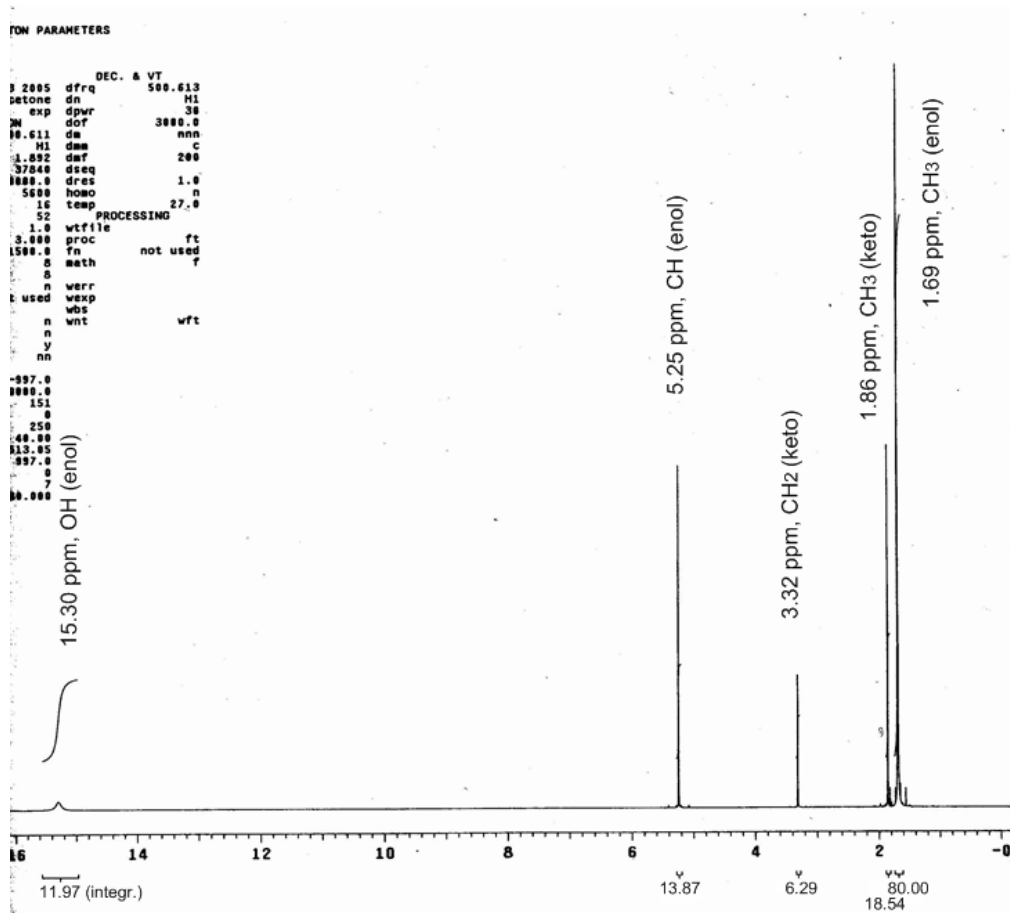

Supplement: b606543k.pdf [file b606543k.pdf]
